# Supplementary material for: Novel CuClSe2microribbons: microwave-assisted synthesis, phase transformation and photo-response properties
Source: Royal Society of Chemistry journal article supplement (doi:10.1039/c4ra08699f), 2014-09-16
Supplement: c4ra08699f1.pdf [file c4ra08699f1.pdf]

**Supporting Information:**

**Novel CuClSe<sub>2</sub> microribbons: microwave-assisted synthesis,  
phase transformation and their photo-response properties**

Yong-Qiang Liu,<sup>ab</sup> Hao-Di Wu<sup>ab</sup>, Yu Zhao<sup>a</sup>, Ge-Bo Pan<sup>\*a</sup>

<sup>a</sup> *Suzhou Institute of Nano-tech and Nano-bionics, Chinese Academy of Sciences;*

<sup>b</sup> *Also at University of Chinese Academy of Sciences.*

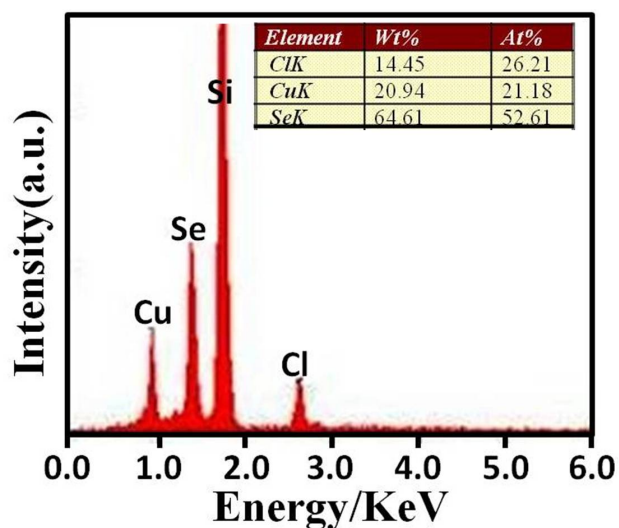

Figure S1. Energy dispersive X-ray spectrum of CuClSe<sub>2</sub> microribbons.

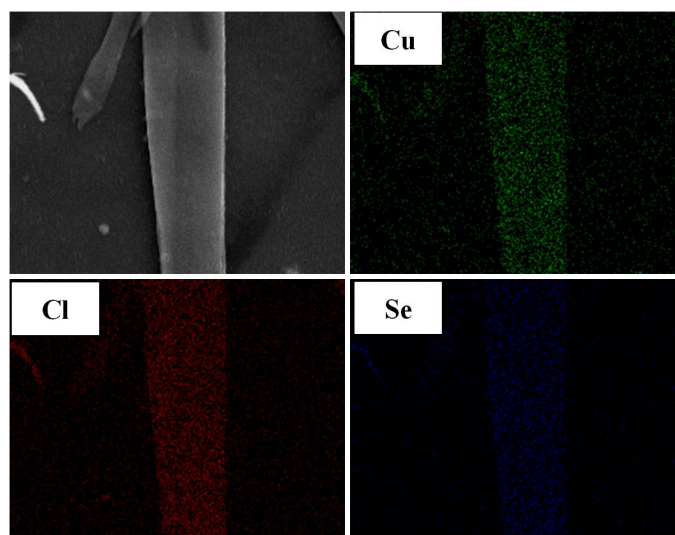

Figure S2. EDS mapping analysis of an individual CuClSe<sub>2</sub> microribbon.

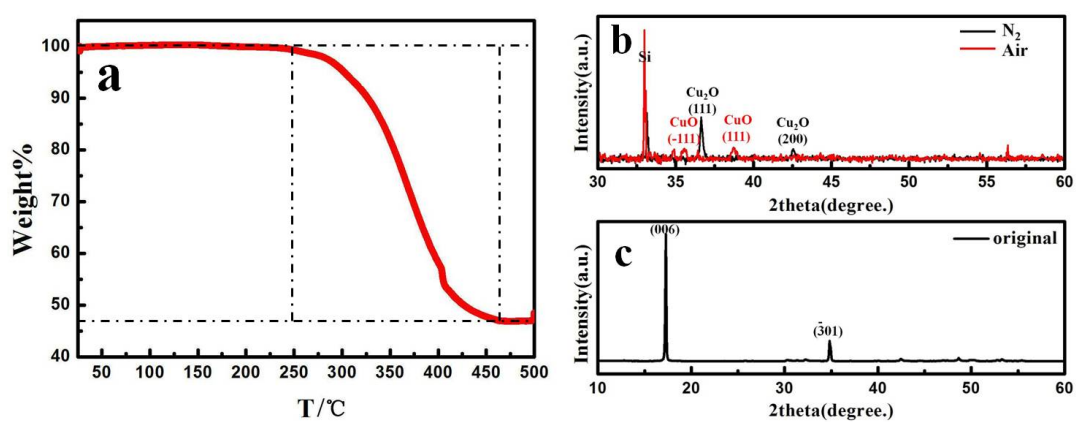

Figure S3. (a) TGA measurement with a heating rate of 10°C/min in N<sub>2</sub>. (b-c) XRD patterns of the as-prepared MRs after treatment at selected temperatures in N<sub>2</sub> and air.

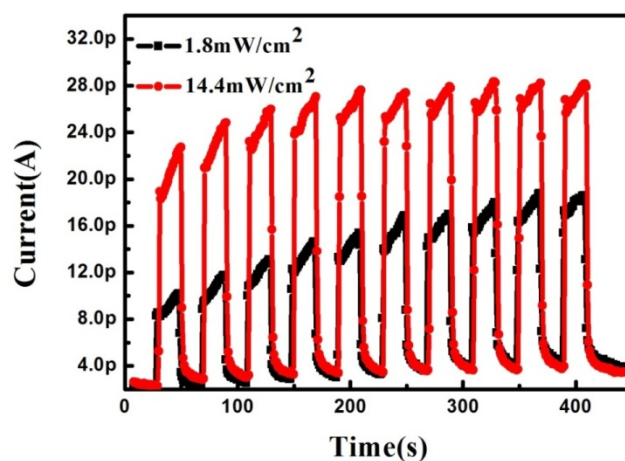

Figure S4. Time-resolved photoresponse curves at a bias of 10 V and an incident light density of 1.8 and 14.4 mW/cm<sup>2</sup>.

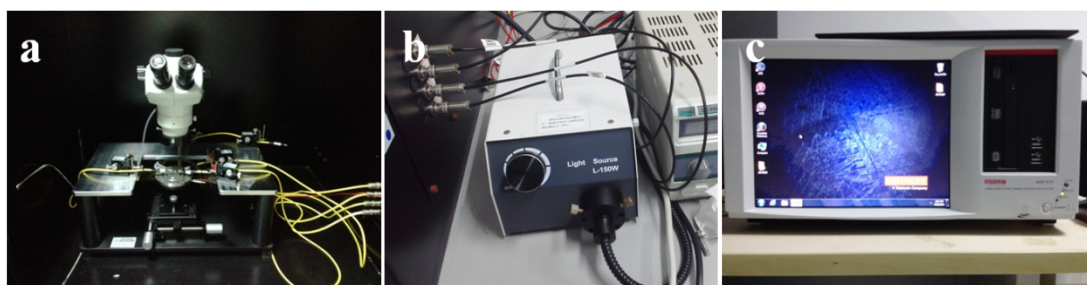

Fig S5. Experimental setup for the photoresponse characteristics: (a) SUSS PM8 probe station; (b) light source; (c) Keithley 4200-SCS.

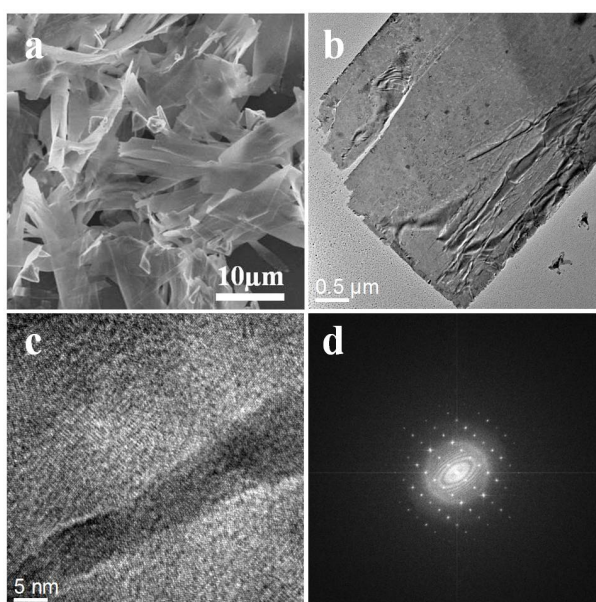

Fig S6. Structural and morphological characterization of copper bromine selenide microribbons: (a) SEM image; (b) TEM image; (c) HR-TEM image; (d) FFT image.
